# Supplementary material for: Predictive Symptoms and Signs of Severe Dengue Disease for Patients with Dengue Fever: A Meta-Analysis
Source: Biomed Res Int. 2014 Jul 1;2014:359308. doi: 10.1155/2014/359308 (PMC4100454; doi:10.1155/2014/359308)
Supplement: Supplementary file 1 — Supporting information: PRIMSA checklist and publication bias in this meta-analysis. [file 359308.f1.zip]

Archive with 2 entries (2 files):
- Supporting Figure S1.eps
- Supporting information-Table 1 PRISMA 2009 Checklist.doc
